# Supplementary material for: Evaluation of the electrochemical energy storage performance of symmetric supercapacitor devices based on eco-friendly synthesized nitrogen-doped graphene-like derivative electrodes from the perspective of their nanostructural characteristics
Source: Royal Society of Chemistry journal article supplement (doi:10.1039/d4ya00526k), 2024-01-01
Supplement: d4ya00526k1.pdf [file d4ya00526k1.pdf]

**Electronic Supplementary Information (ESI)**

**Table S1. Elemental composition of graphitic samples by XPS analysis**

| <b>Sample Code</b> | <b>Elemental Composition (at %)</b> |          |          |
|--------------------|-------------------------------------|----------|----------|
|                    | <b>C</b>                            | <b>O</b> | <b>N</b> |
| <b>NG-NCD250</b>   | 82.02                               | 6.9      | 11.08    |
| <b>NG-LCD250</b>   | 86.79                               | 6.2      | 7.01     |
| <b>NG-HCD250</b>   | 90.2                                | 6        | 3.8      |
| <b>NG-HCD270</b>   | 90.55                               | 6.65     | 3.8      |

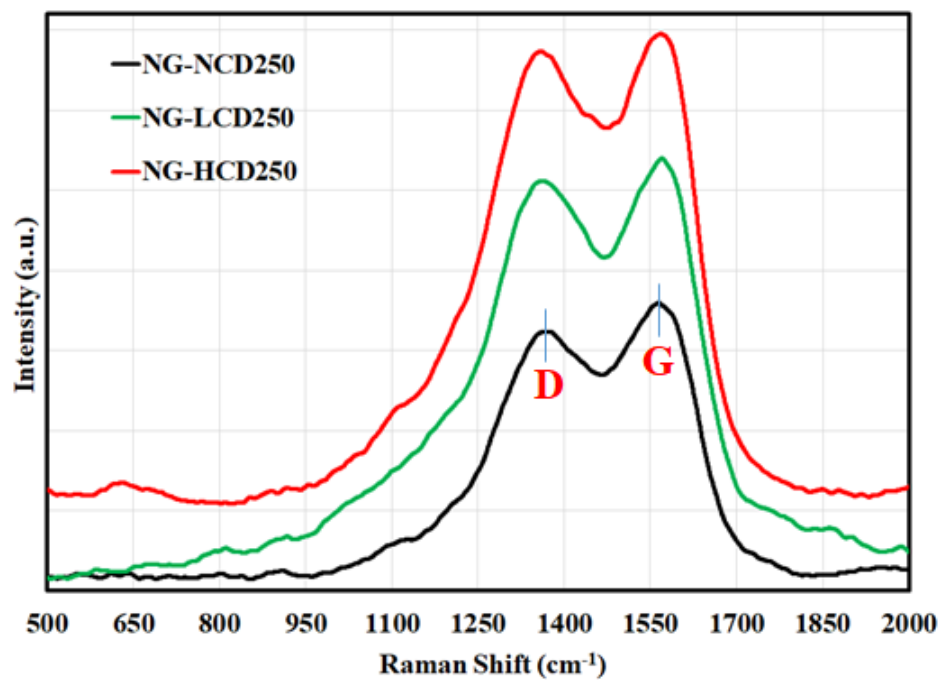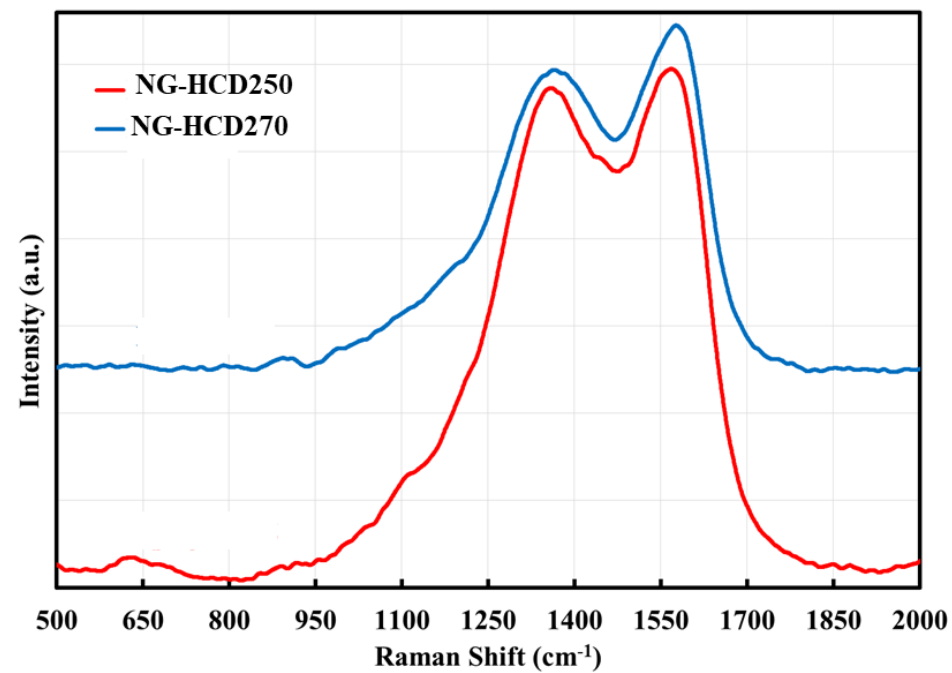

Figure S1. Raman Spectra of synthesized graphitic samples at (a) variant CTAB doses and fixed hydrothermal temperature of 250 °C, (b) variant hydrothermal temperatures and fixed highest CTAB dose

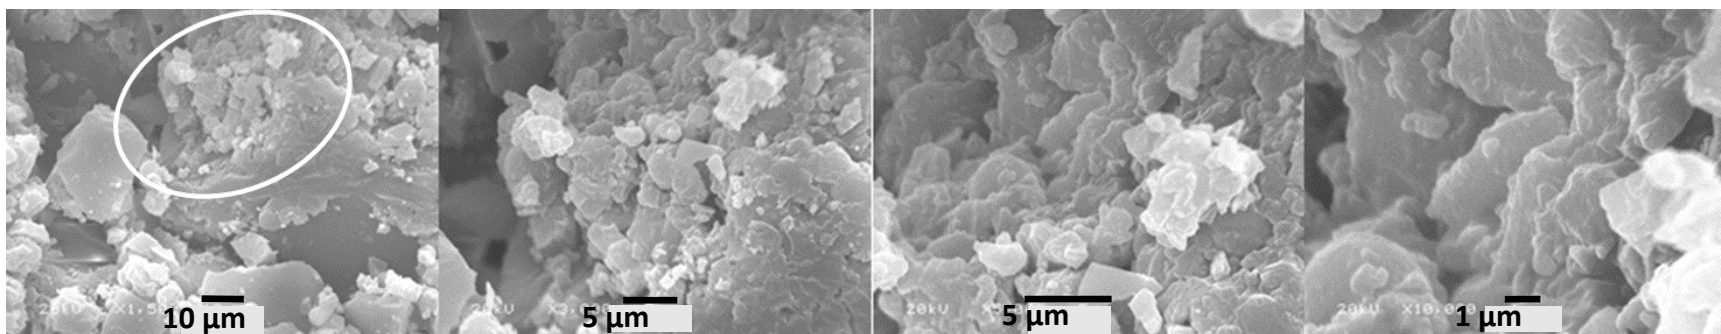

**Figure S2. SEM micrographs of NG-HCD250 captured gradually from low to high magnifications**

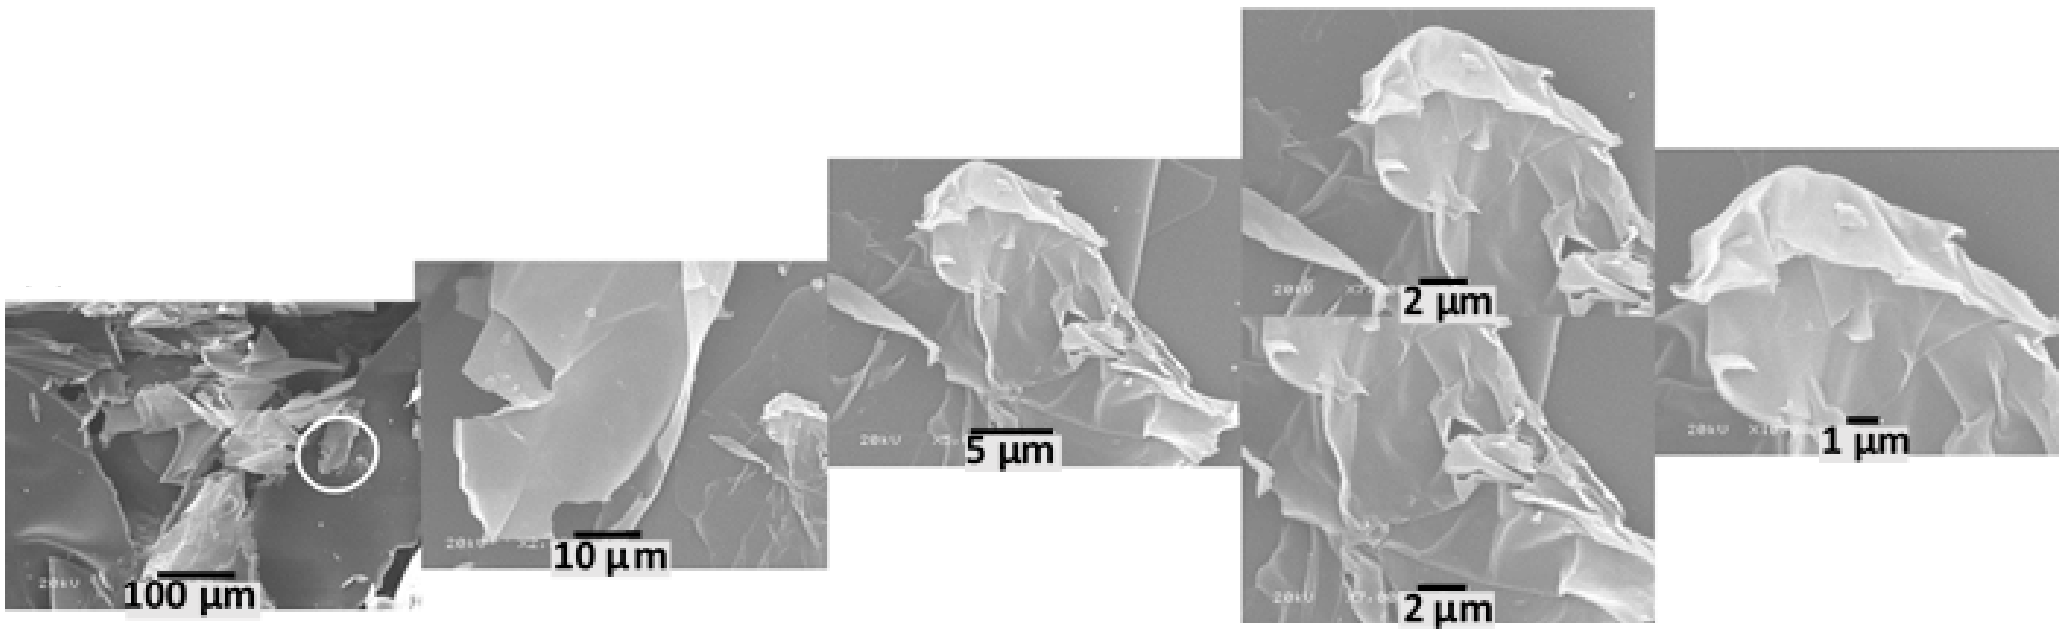

**Figure S3. SEM micrographs of NG-HCD270 captured gradually from low to high magnifications**

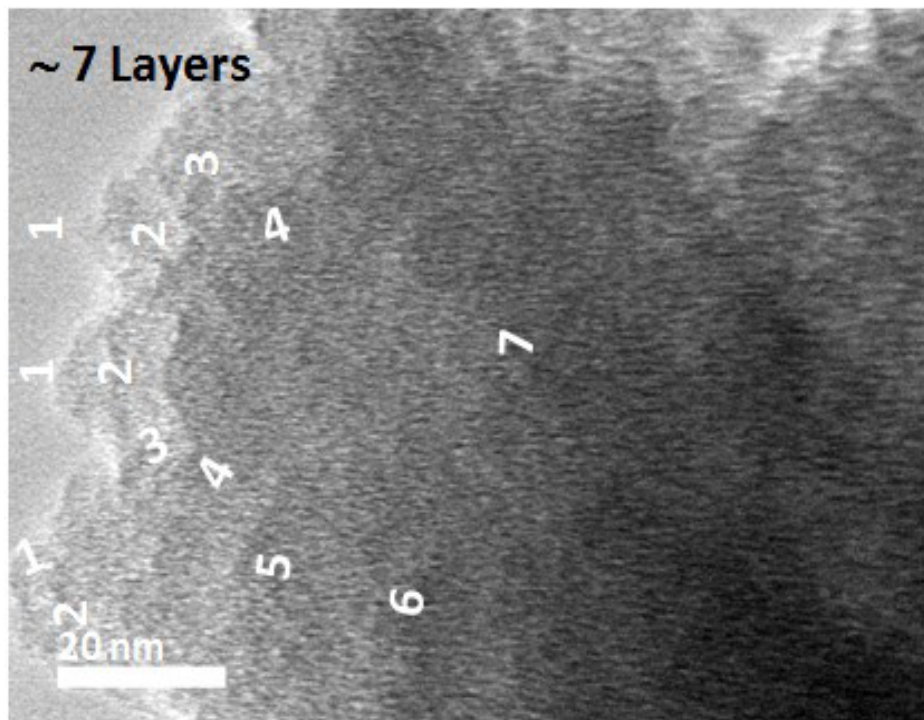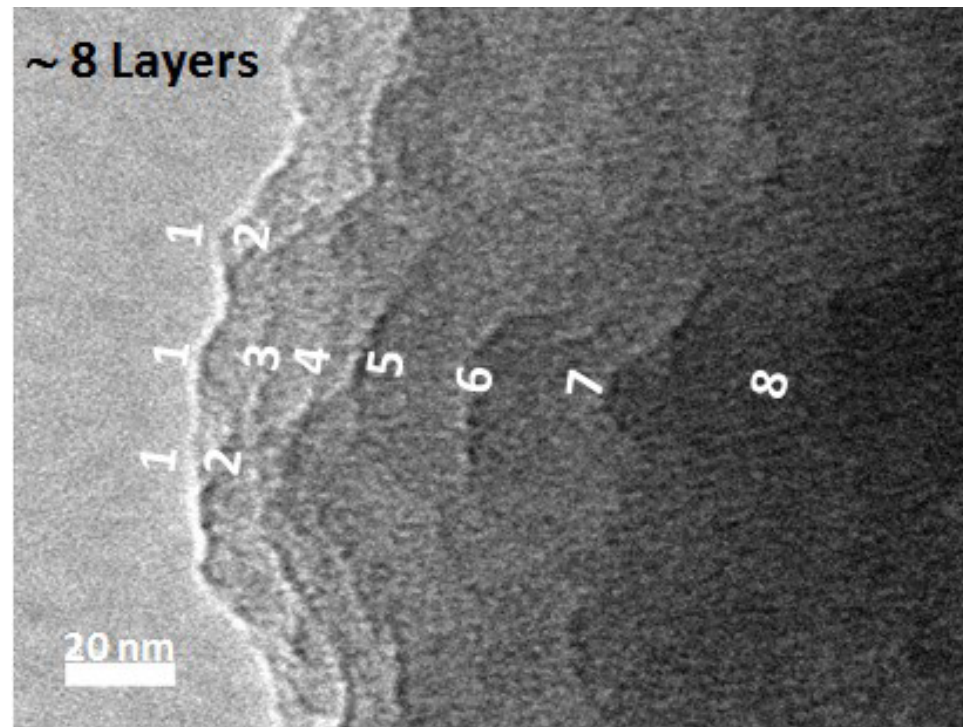

**Figure S4. High magnification HR-TEM micrographs of NG-HCD270 at various regions within the sample**
